# Supplementary material for: Contribution of Mitochondrial Activity to Doxorubicin-Resistance in Osteosarcoma Cells
Source: MDPI journal article supplement (doi:10.3390/cancers15051370), 2023-02-21
Supplement: s1 [file s1]

# Supplementary Materials: Contribution of Mitochondrial Activity to Doxorubicin-Resistance in Osteosarcoma Cells

Isabella Giacomini, Margherita Cortini, Mattia Tinazzi, Nicola Baldini, Veronica Cocetta, Eugenio Ragazzi, Sofia Avne and Monica Montopoli

**Table S1.** Cytotoxic effect of doxorubicin (calculated as IC<sub>50</sub>) after 24, 48, and 72 hours of treatment in MG63, DXR 30 ng/mL, and MG63 DXR 100 ng/mL cell lines.

| Cell Line         | IC <sub>50</sub> Doxorubicin (ng/mL) <sup>a</sup> |                    |                    |
|-------------------|---------------------------------------------------|--------------------|--------------------|
|                   | 24 Hours                                          | 48 Hours           | 72 Hours           |
| MG63              | 356.36 ± 5.11                                     | 143.68 ± 3.51      | −3.23 ± 0.12       |
| MG63 DXR30 ng/mL  | 1329.15 ± 9.12 ****                               | 402.18 ± 4.22 **** | 201.63 ± 7.40 **** |
| MG63 DXR100 ng/mL | 820.54 ± 6.50 °°°°                                | 485.95 ± 2.17 °°°° | 308.38 ± 9.01 °°°° |

<sup>a</sup> Values were determined by regression analysis and are expressed as mean ± SD of three different experiments. \*\*\*\**p*<0.0001, MG63 DXR 30 ng/mL vs MG63 cells; °°°°*p*<0.0001, MG63 DXR 100 ng/mL vs. MG63 cells

**Table S2.** Cytotoxic effect of doxorubicin (calculated as IC<sub>50</sub>) after 24, 48, and 72 hours of treatment in HOS, HOS DXR 10 ng/mL, HOS DXR 30 ng/mL, and HOS DXR 100 ng/mL cell lines.

| Cell Line       | IC <sub>50</sub> Doxorubicin (ng/mL) <sup>a</sup> |                    |                    |
|-----------------|---------------------------------------------------|--------------------|--------------------|
|                 | 24 Hours                                          | 48 Hours           | 72 Hours           |
| HOS             | 180.36 ± 8.66                                     | −96.67 ± 3.17      | −144.89 ± 4.98     |
| HOS DXR10 ng/mL | 1550.42 ± 12.65 ****                              | 331.15 ± 2.86 **** | 362.64 ± 4.31 **** |
| HOS DXR30 ng/mL | 1041.80 ± 1.50 °°°°                               | 251.10 ± 2.35 °°°° | 270.18 ± 1.61 °°°° |

<sup>a</sup> Values were determined by regression analysis and are expressed as mean ± SD of three different experiments. \*\*\*\**p*<0.0001, HOS DXR 10 ng/mL vs. HOS cells; °°°°*p*<0.0001, HOS DXR 30 ng/mL vs. HOS cells; \*\*\*\**p*<0.0001, HOS DXR 100 ng/mL vs. HOS cells.

VDAC1

TOM20

ACTIN

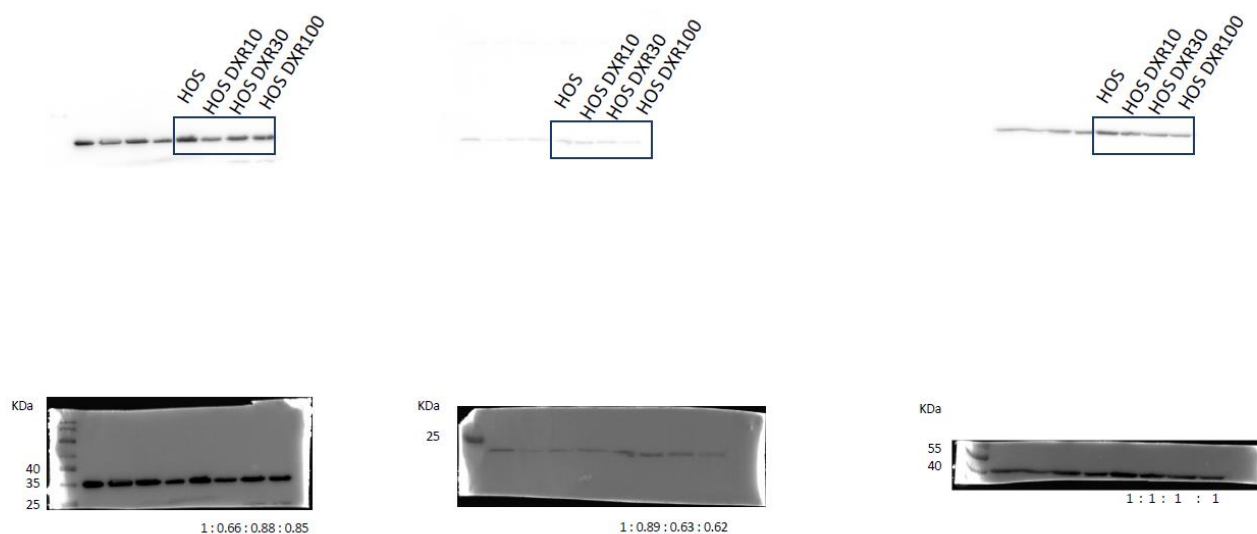

**Figure S1.** Western blot HOS.

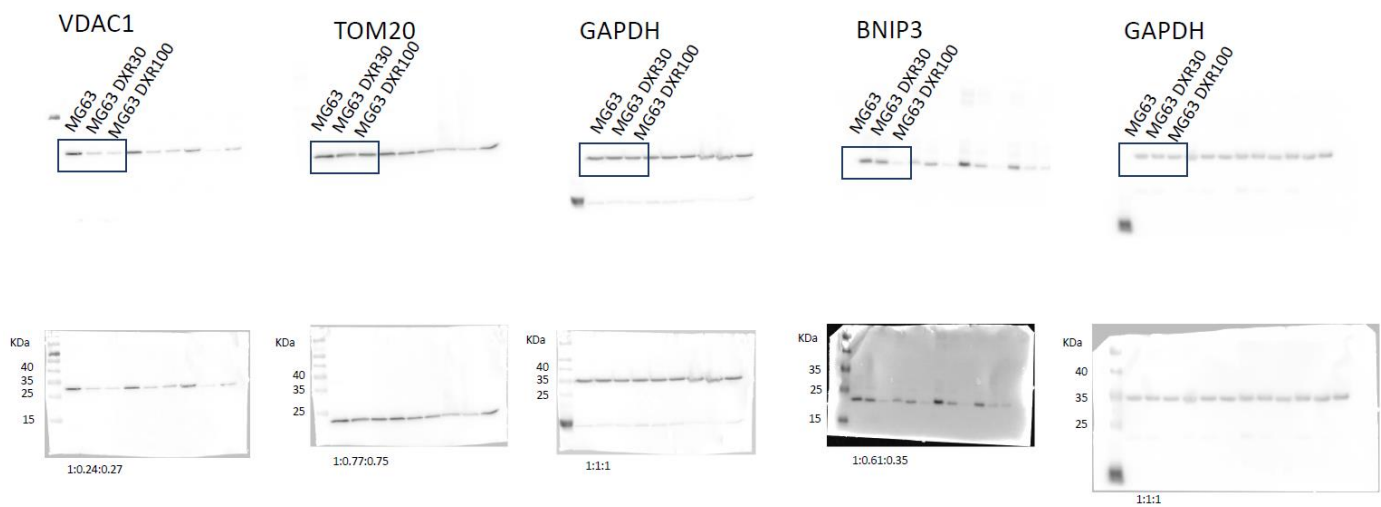

Figure S2. Western blot MG63.
